# Supplementary material
Source: publisher figshare collection journal article supplement (https://tandf.figshare.com/ndownloader/files/22824371)
Supplement: Supplementary file 1 [file 22824371]

## SUPPLEMENTAL INFORMATION

### Molecular Dynamics Study of Functionally Relevant Interdomain and Active Site Interactions in the Autotransporter Esterase EstA from *Pseudomonas aeruginosa*

Natalia Mrnjavac,<sup>1</sup> Mario Vazdar,<sup>2</sup> Branimir Bertoša<sup>1\*</sup>

<sup>1</sup> Department of Chemistry, Faculty of Science, University of Zagreb, Horvatovac 102A, HR-10000 Zagreb, Croatia

<sup>2</sup> Ruđer Bošković Institute, Bijenička cesta 54, 10 000 Zagreb, Croatia

\*Corresponding author: Branimir Bertoša, Department of Chemistry, Faculty of Science, University of Zagreb, Horvatovac 102a, HR-10000 Zagreb, Croatia; Fax: +38514606131; Tel: +38514606132; e-mail: [bbertosa@chem.pmf.hr](mailto:bbertosa@chem.pmf.hr)

a)

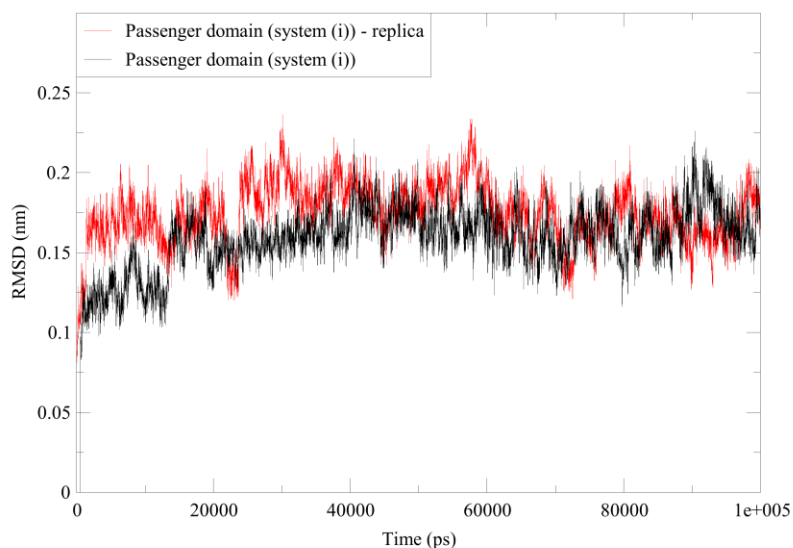

b)

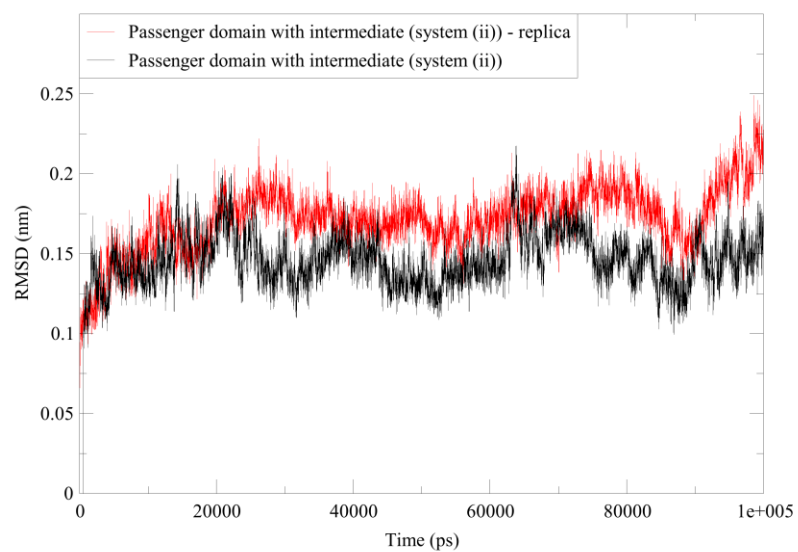

c)

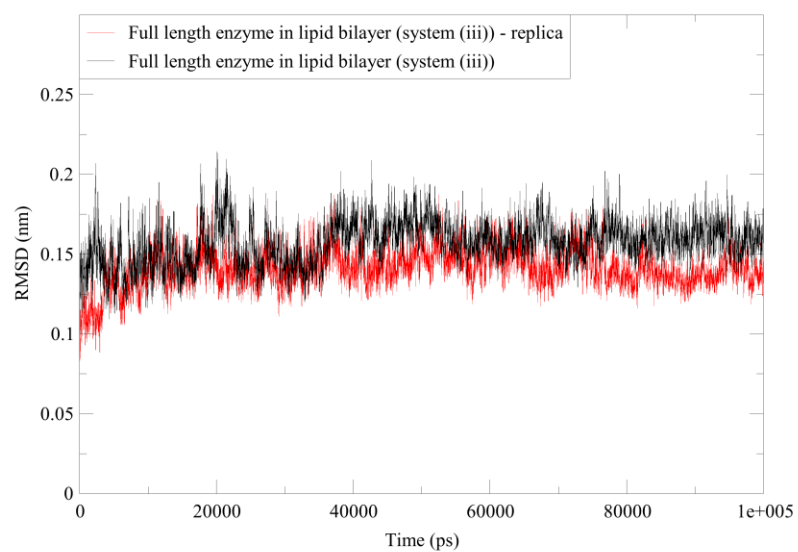

d)

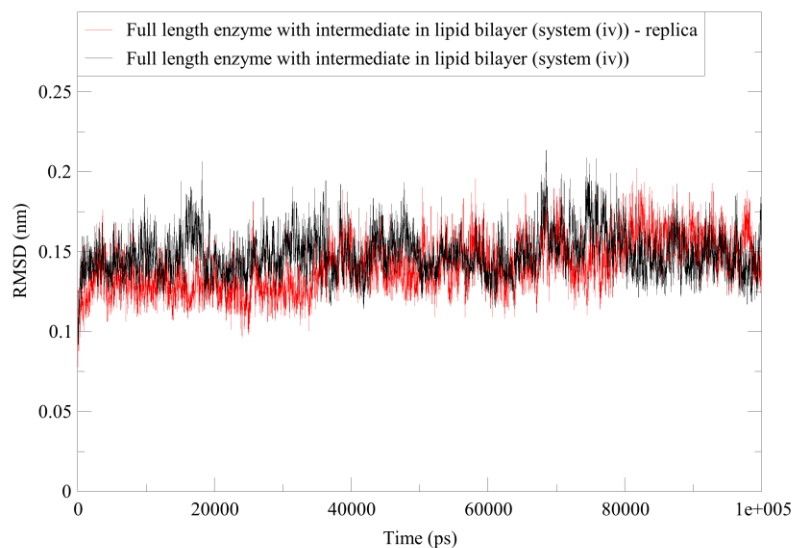

Figure S1. RMSD plots of backbone atoms of the simulations performed twice (black and red) for each of four systems: a) the isolated passenger domain of EstA (system (i)), b) the isolated passenger domain of EstA with 4-hydroxyphenyl octanoate bound as tetrahedral intermediate (system (ii)), c) the full-length EstA enzyme (system (iii)), and d) with (iv) the full-length EstA enzyme with 4-hydroxyphenyl octanoate bound as tetrahedral intermediate (system (iv)).

a)

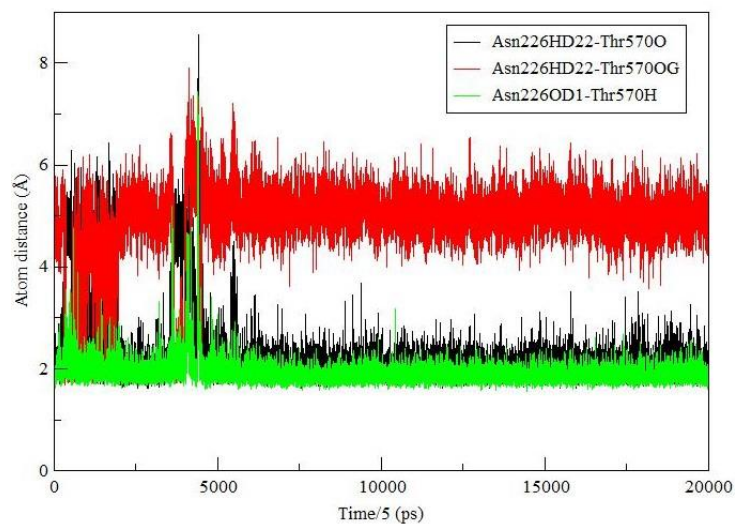

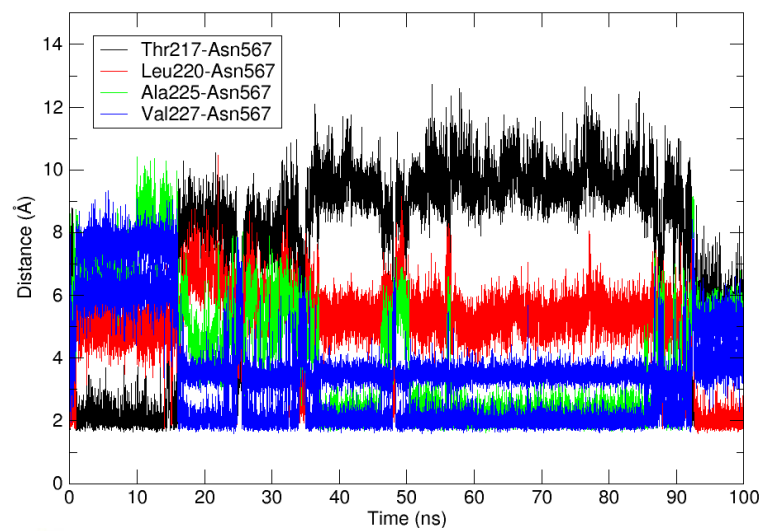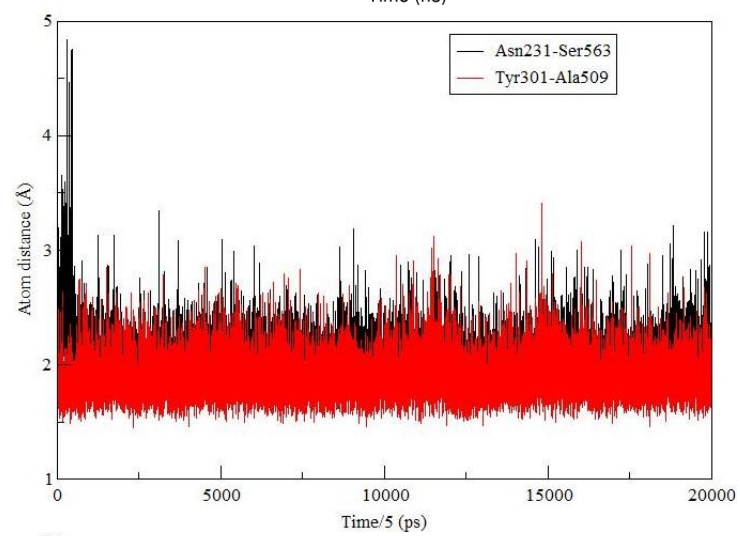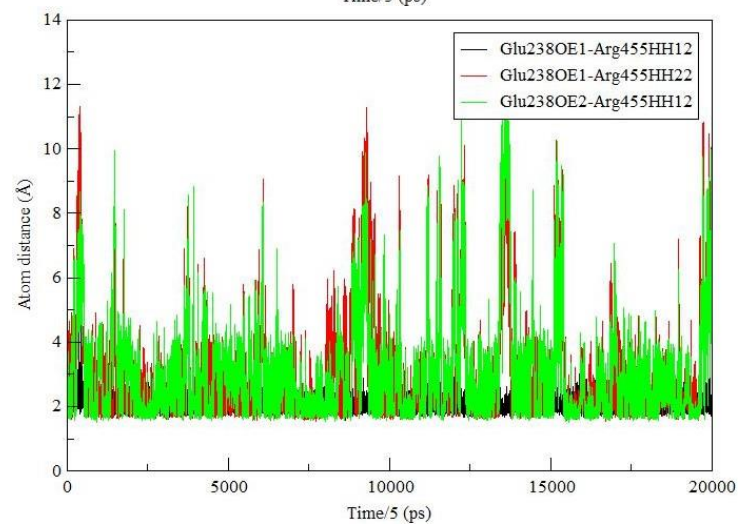

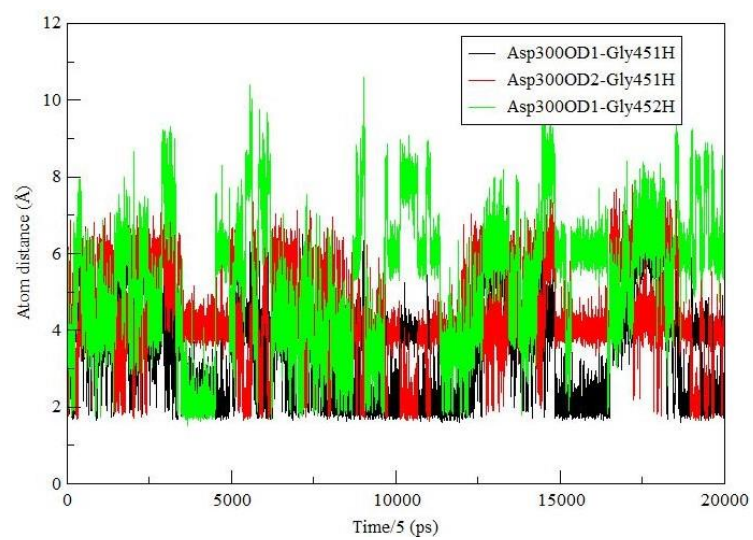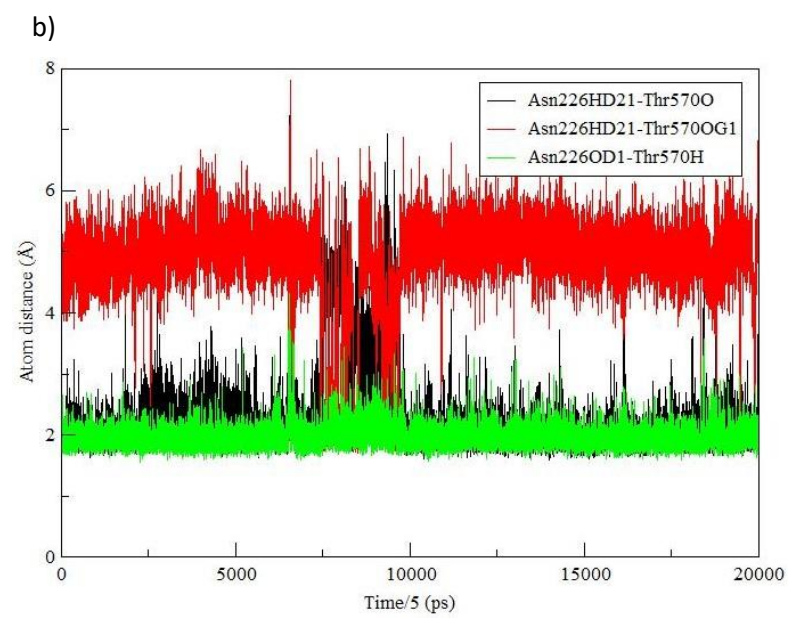

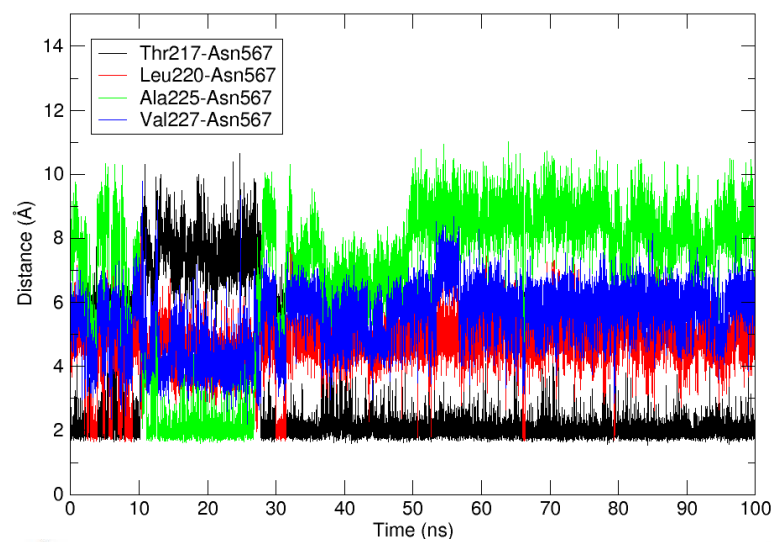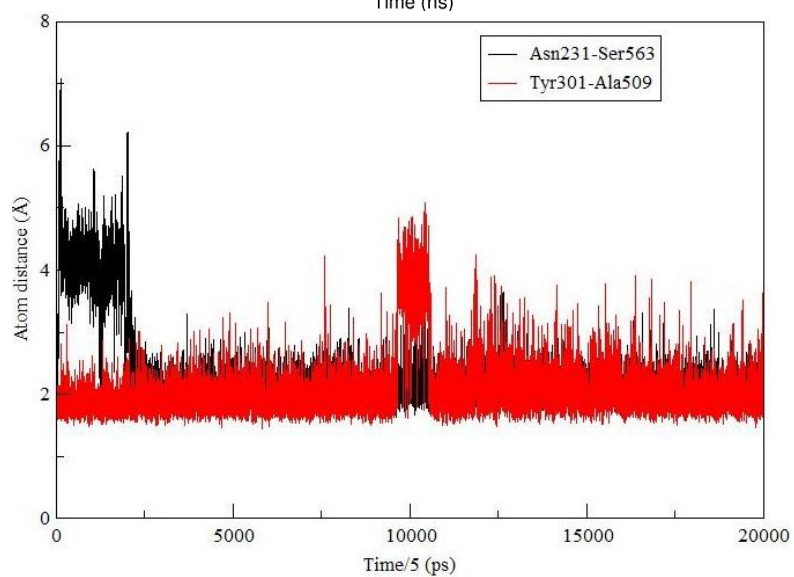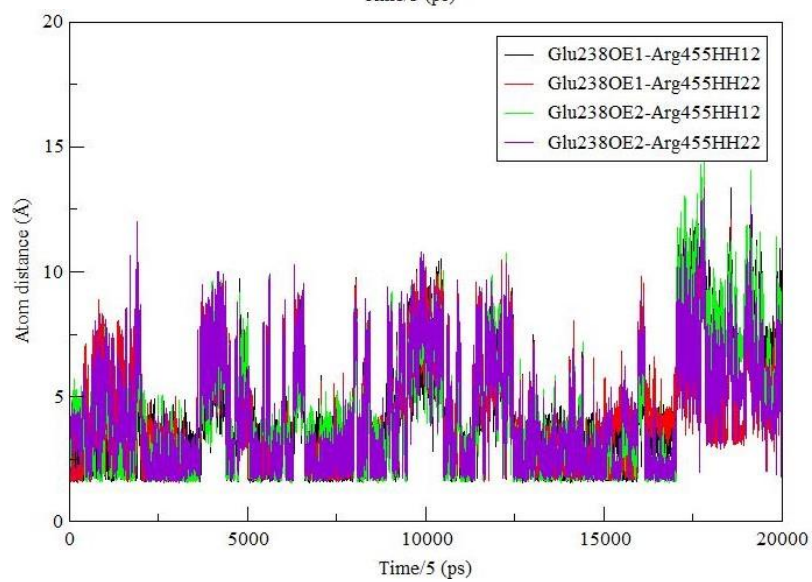

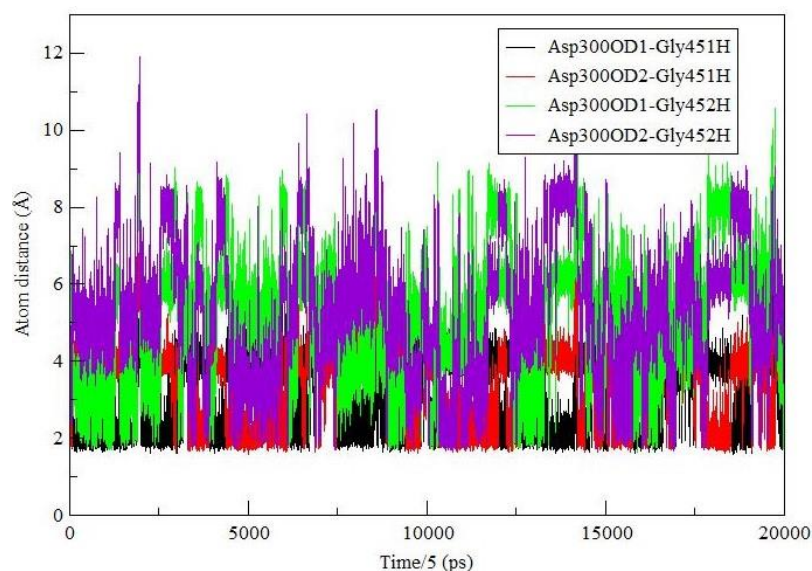

Figure S2. Distance measurements for residues involved in interdomain hydrogen bonds (see Table 1). Atoms involved are specified in the legend only when there are more interacting atoms between two residues. Otherwise, only interacting residues are specified in the legend. a) Full-length enzyme (system (iii)). b) Full-length enzyme with tetrahedral intermediate (system (iv)).

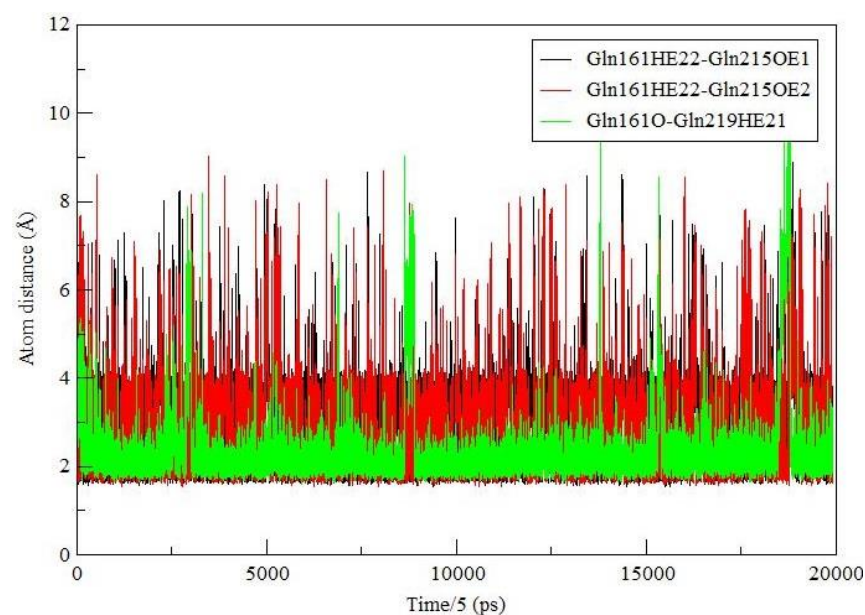

Figure S3. Distance measurement for residues in interaction between helices 7 and 9 in the system of the passenger domain with tetrahedral intermediate (system (ii)).



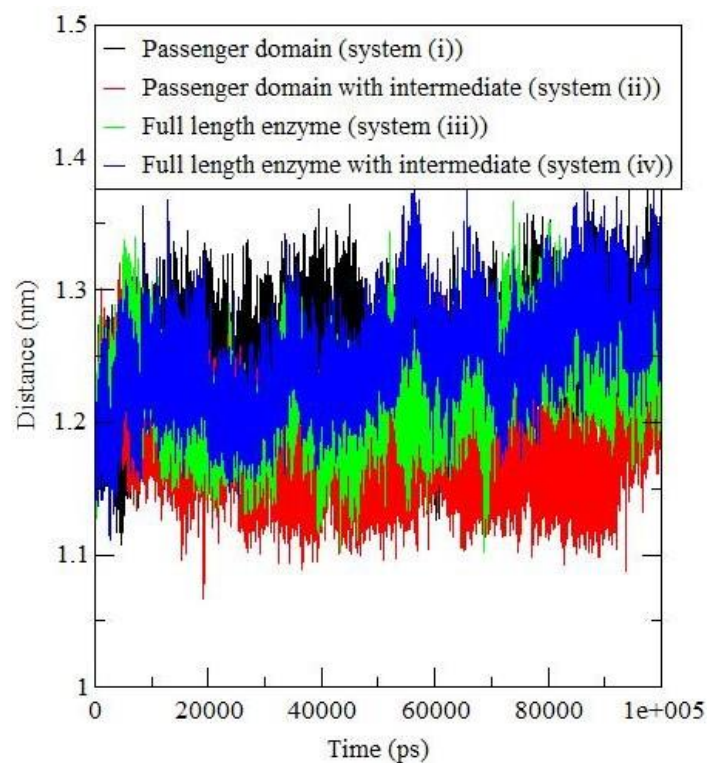

Figure S4. Distance between the centres of mass of helix 6 and the upper part of helix 7 throughout the simulation.

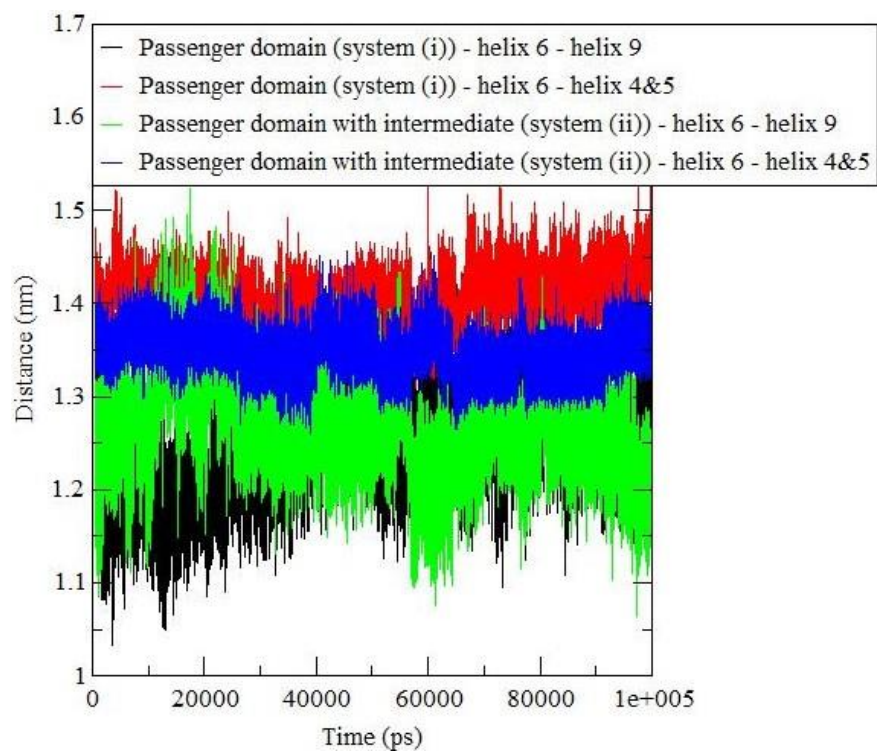



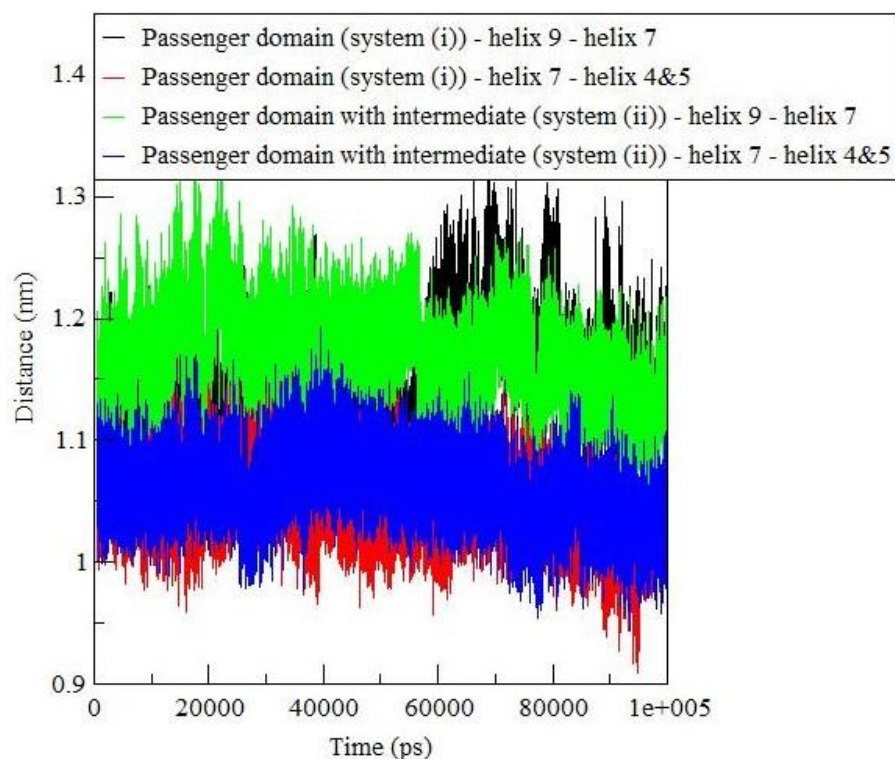

Figure S5. Comparison of centre-of-mass distances between helices in the passenger domain system (i) which exhibits a closed active site conformation and the passenger domain system with bound intermediate (ii) which shows an open active site conformation. a) Distance between helix 6 and helix 9, and distance between helix 6 and helices 4 and 5. b) Distance between helix 9 and helix 7, and distance between helix 7 and helices 4 and 5.

a)

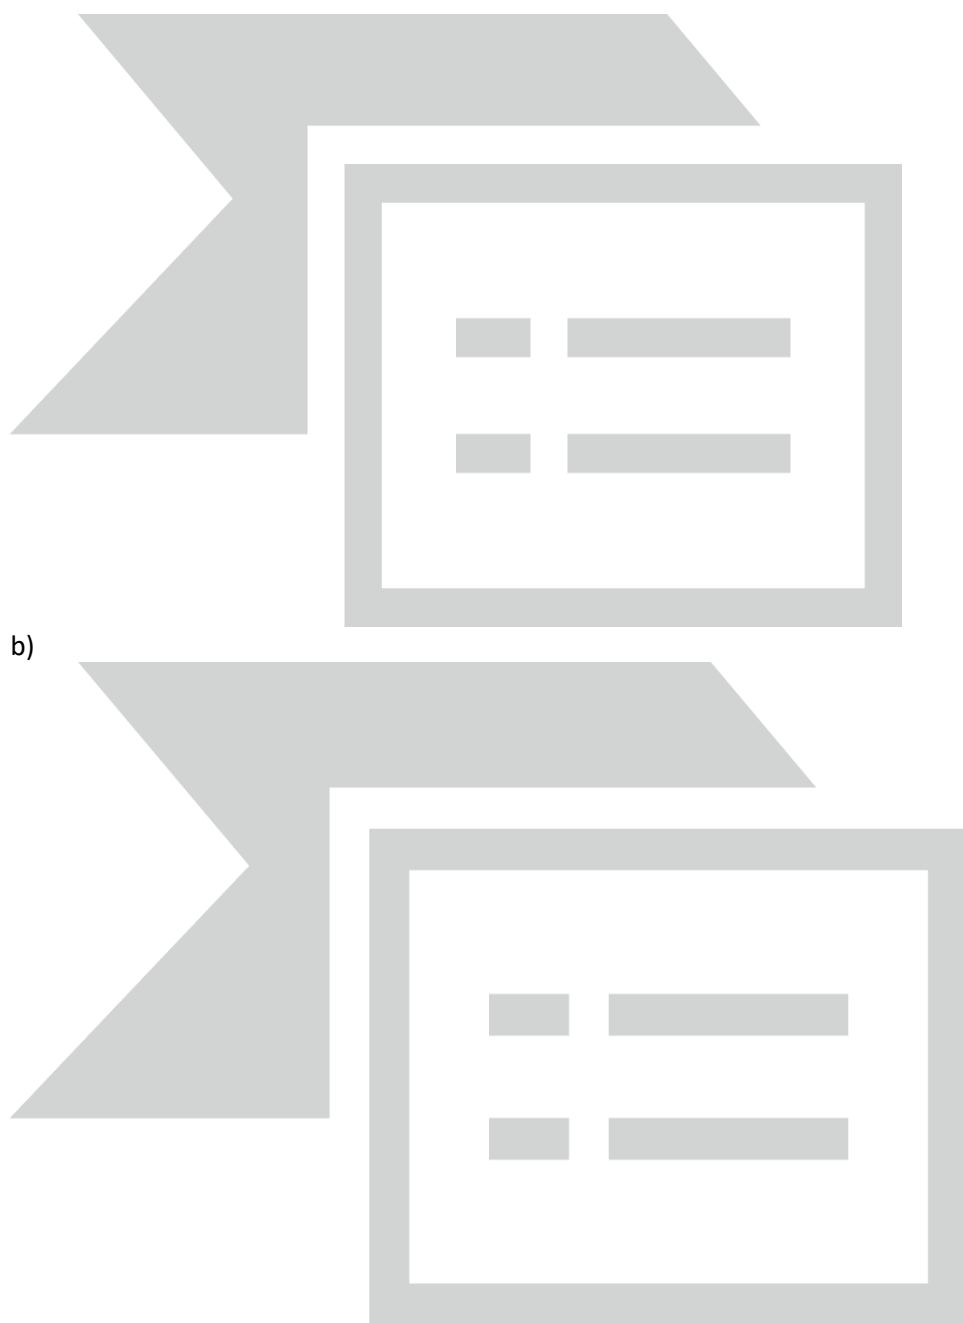

Figure S6. Number of hydrogen bond interactions between water molecules found in the vicinity ( $3 \text{ \AA}$ ) of DOPE/protein phase and protein. During the simulation of: a) system (iii), b) system (iv).

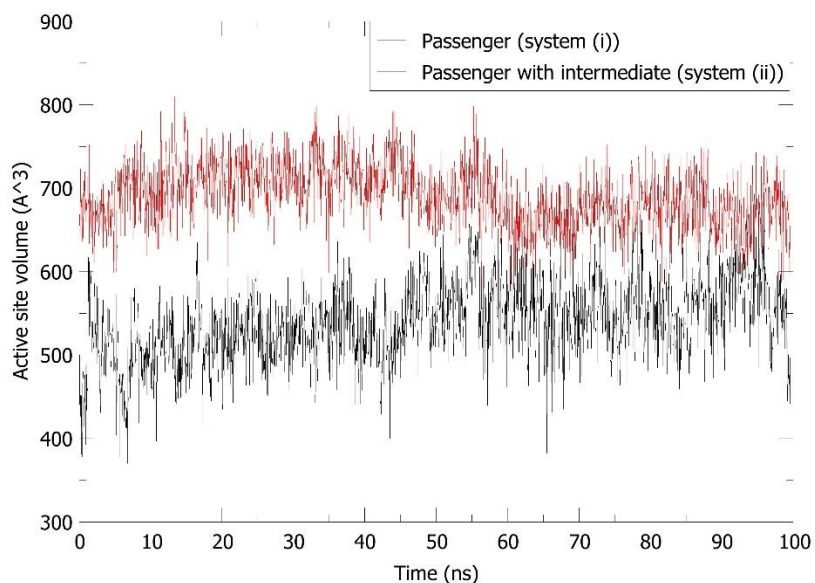

Figure S7. Changes of the active site volume of the isolated passenger domain of EstA (system (i)) (black) and the isolated passenger domain of EstA with intermediate (system (ii))(red). Active site volume calculations were carried out using the POVME 3.0 software [48]. The pocket was defined based on the ligand (4 hydroxyphenyl octanoate) present in system (ii). The inclusion region thus created was used to calculate the pocket volume for system (i) as well.
